# Supplementary material for: A microfluidic chip for real-time studies of the volume of single cells
Source: Royal Society of Chemistry journal article supplement (doi:10.1039/b806003g), 2008-10-23
Supplement: fig-si-iv.pdf [file fig-si-iv.pdf]

#### Supporting Information IV:

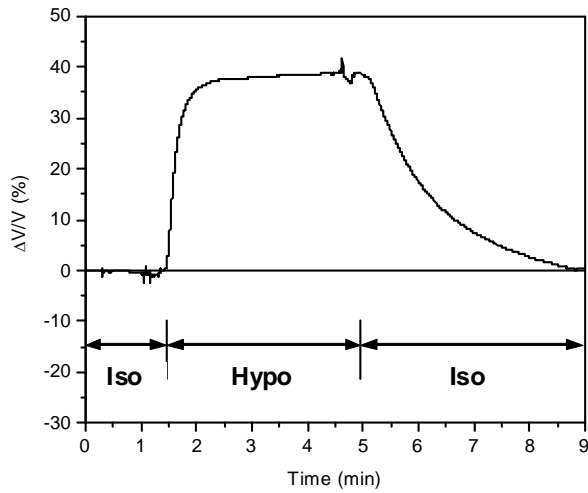

**Figure SI-IV:** Volume change of a single NIH 3T3 cell in response to a hypotonic stimulation. The solution in the channel was changed sequentially from isotonic (326 mOsm) to hypotonic solution (187 mOsm) and back to isotonic. The volume was measured using single cell volume sensor chip with an input current of 2  $\mu$ A RMS.
